# Supplementary material
Source: ML conference proceedings conference paper supplement (https://openaccess.thecvf.com/content/ICCV2023/html/Raj_DreamBooth3D_Subject-Driven_Text-to-3D_ICCV_2023_paper.html)
Supplement: Supplementary file 1 [file Raj_DreamBooth3D_Subject-Driven_Text-to-3D_ICCV_2023_supplemental.zip]

## A. Summary Video with Visual Results

We summarize our findings in a video, which outlines the three-stage DreamBooth3D method and includes a comparison to the baselines. We also show how our approach compares to other approaches via a user study. Finally, several example applications are shown, including material editing, accessorization, color changes, and pose changes.

## B. NeRF Details

We use Mip-NeRF [?] as our choice of volumetric representation. Particularly, to render the color of a ray  $\mathbf{r}(t) = \mathbf{o} + t\mathbf{d}$  cast into the scene, Mip-NeRF divides the ray into intervals and for each interval calculates the mean and variance  $(\mu, \Sigma)$  of a conical frustum corresponding to the interval. These values are then used to encode the ray using integrated positional encoding

$$\gamma(\mu, \Sigma) = \left\{ \begin{bmatrix} \sin(2^l \mu) \exp(-2^{(2l-1)} \text{diag}(\sigma)) \\ \sin(2^l \mu) \exp(-2^{(2l-1)} \text{diag}(\sigma)) \end{bmatrix} \right\}_{l=0}^L \quad (1)$$

The learnt volume  $\mathcal{N}_\phi$  is then used to generate albedo  $\mathbf{c}$  and opacity  $\sigma$ .

$$\mathbf{c}, \sigma = \mathcal{N}_\phi(\gamma(\mu, \Sigma))$$

The final color is then calculated using numerical quadrature as in [?]. As in [?], we define  $\Sigma = \lambda_t^2 I$ , where,  $\lambda_t$  is annealed from a high to low value, to gradually introduce higher frequency components during the optimization. The NeRF volume is regularized using the orientation loss introduced in Ref-NeRF [?], to encourage better geometry. Particularly,

$$\mathcal{L}_{ori} = \sum_i \text{stop\_grad}(w_i) \max(0, \mathbf{n}_i \cdot \mathbf{v}) \quad (2)$$

Where  $\mathbf{n}_i$  is the normal direction at a point,  $w_i$  are rendering weights as defined in [?] and  $\mathbf{v}$  is the lighting direction. An additional opacity loss is used to encourage foreground/background separation

$$\mathcal{L}_{op} = \sqrt{(\sum_i w_i)^2 + 0.01} \quad (3)$$

The final NeRF regularization loss is then given by:

$$\mathcal{L}_{nerf} = \mathcal{L}_{op} + \mathcal{L}_{ori} \quad (4)$$

## C. Additional results

Fig. 1 provides additional results with associated depths, normals and alpha maps to demonstrate the 3D consistency of our results on a variety of subjects. Fig. 2 shows multiple views of the assets rendered for the same subject with different text prompts.

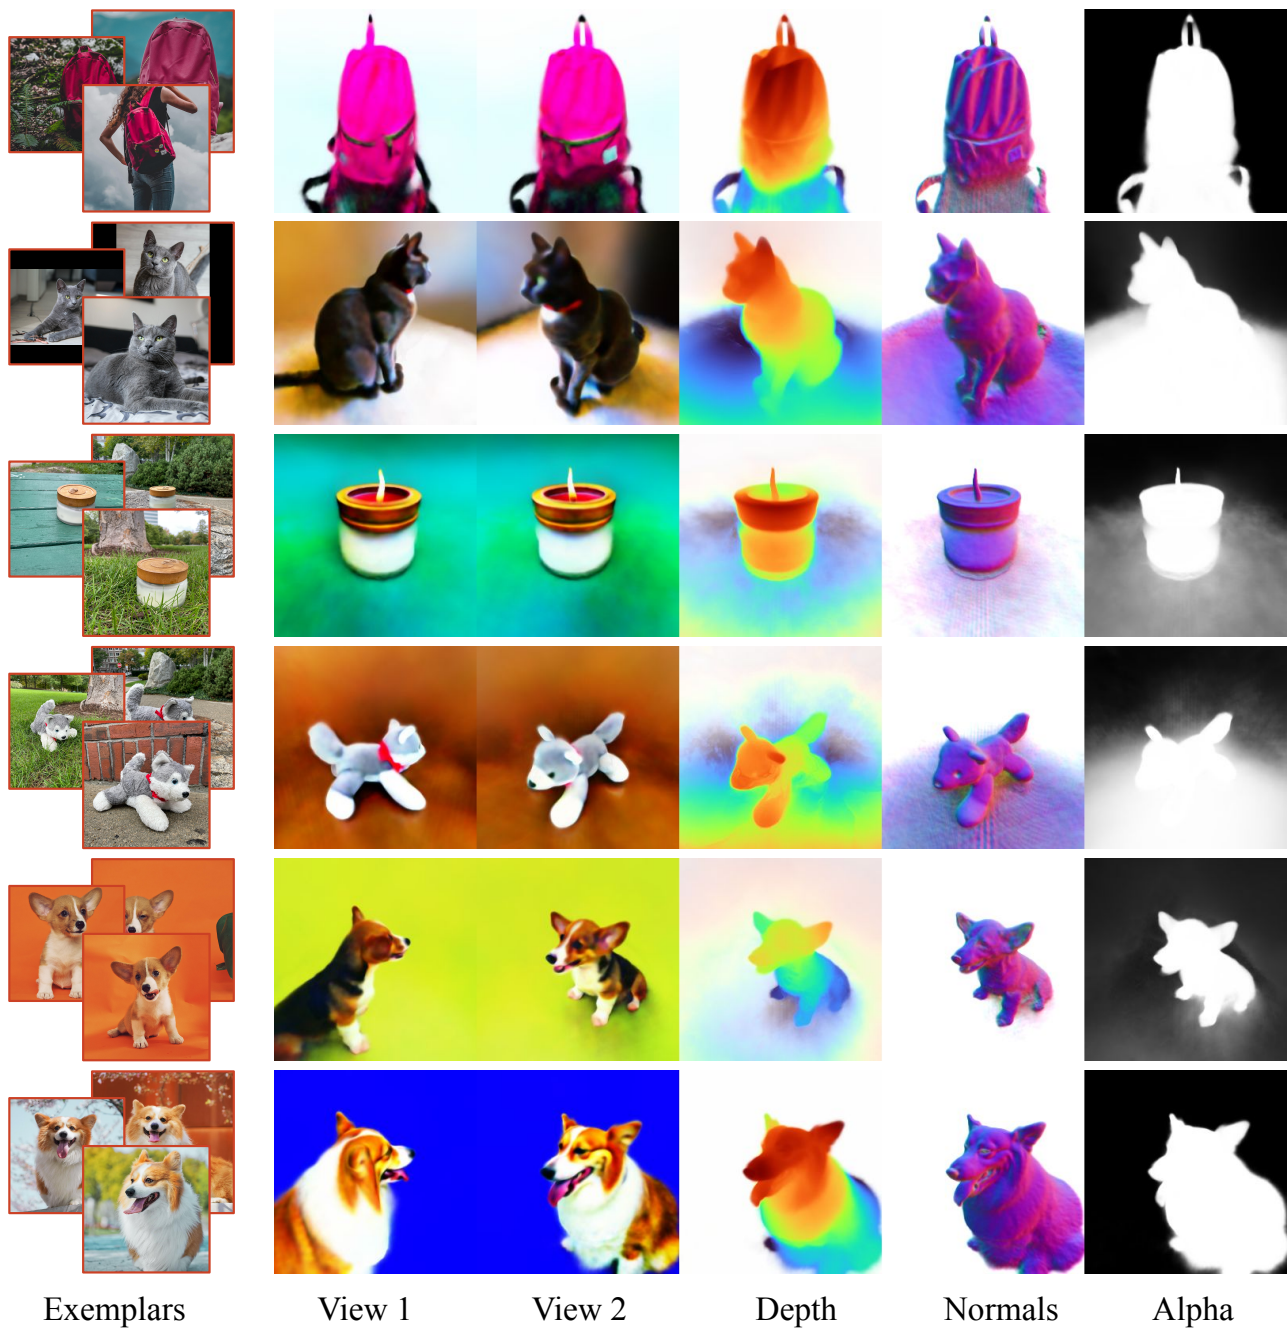

Figure 1: **Additional Results.** Dreambooth3D can produce 3D consistent volumes from text prompts. The figure shows generated assets for the base prompt "A photo of <v>" where <v> is the subject presented in the first column. Column 2 and 3 shows two different views of the rendered volume. Column 3, 4 and 5 shows the depth, normals and opacity of the second view respectively.

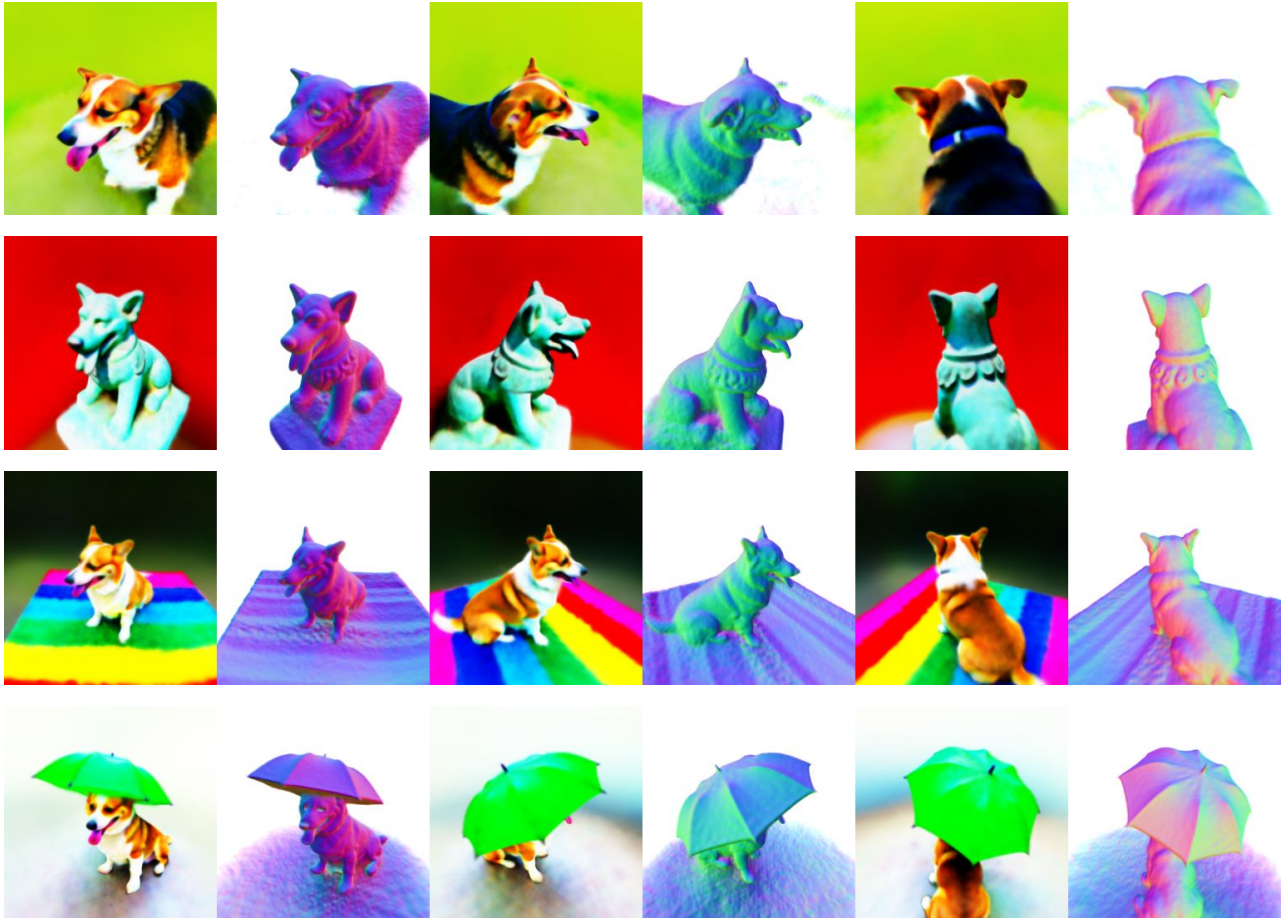

Figure 2: **Additional Results.** Dreambooth3D is capable of a number of accessorization, composition, material editing tasks through text prompting. An example of this form of prompting is "A photo of <v> wearing a green umbrella". Row 1 shows the rendered geometry and normals of the base subject, and the subsequent rows show material-edited, composited, or accessorized variants. Row 2 demonstrates a material edit to change the dog into a stone statue. Row 3 composites a rainbow carpet into the scene. Row 4 adds a green umbrella.
